# Supplementary material for: Selenium tethered copper phthalocyanine hierarchical aggregates as electrochemical hydrogen evolution catalysts
Source: Royal Society of Chemistry journal article supplement (doi:10.1039/d1se00595b), 2021-01-01
Supplement: d1se00595b1.pdf [file d1se00595b1.pdf]

## Selenium Tethered Copper Phthalocyanine Hierarchical Aggregates as Electrochemical Hydrogen Evolution Catalysts

<sup>a</sup>Indherjith Sakthinathan, <sup>a</sup>Manivannan Mahendran, <sup>b</sup>Karthik Krishnan\*, <sup>c</sup>Selvakumar Karuthapandi\*

<sup>a</sup> Electroorganic Division, CSIR-Central Electrochemical Research Institute, Karaikudi, Tamil Nadu-630003, India.

<sup>b</sup> Corrosion and Material Protection Division, CSIR-Central Electrochemical Research Institute, Karaikudi, Tamil Nadu-630003, India.

<sup>c</sup> Department of Chemistry, School of Advanced Sciences, VIT-AP University, Amaravati, AP 522237, India.

E-mail: selvakumar.k@vitap.ac.in, karthikk@cecri.res.in

| <b>S.No</b> | <b>Content</b>                                            | <b>Page no.</b> |
|-------------|-----------------------------------------------------------|-----------------|
| 1           | Abbreviation                                              | 2               |
| 2           | NMR Spectrum                                              | 3-7             |
| 3           | UV-Visible spectrum of (n-OctSe) <sub>8</sub> CuPc        | 7               |
| 4           | EPR spectrum of (n-OctSe) <sub>8</sub> CuPc               | 8               |
| 5           | Cyclic voltammogram of (n-OctSe) <sub>8</sub> -CuPc       | 8               |
| 6           | A general scheme for selenoxide elimination reaction      | 9               |
| 7           | MALDI Characterization                                    | 10-12           |
| 8           | X-Ray Photoelectron Spectroscopic (XPS) data              | 13              |
| 9           | FTIR spectrum FAs and PAs                                 | 14              |
| 10          | Electrochemically active surface area (ECSA) measurements | 15              |
| 11          | Cycling stability of FAs and PAs                          | 16              |
| 12          | Post-HER TEM imaging                                      | 17              |
| 13          | FTIR Spectrum of PAs before and after catalysis           | 18              |
| 14          | HER overpotential comparison                              | 19              |
| 15          | Table S1 and S2                                           | 20-21           |
| 16          | References                                                | 21-22           |

## 1. Abbreviation

|       |                                             |
|-------|---------------------------------------------|
| CuPc  | Copper Phthalocyanine                       |
| CV    | Cyclic Voltammetry                          |
| DBU   | 1,8-Diazabicyclo[5.4.0]undec-7-ene          |
| DCM   | Dichloromethane                             |
| DMF   | N,N'-dimethylformamide                      |
| ECSA  | Electrochemical active surface area         |
| EIS   | Electrochemical Impedance Spectroscopy      |
| EPR   | Electron Paramagnetic Resonance             |
| FAs   | Fibrous Aggregates                          |
| GCE   | Glassy carbon electrode                     |
| HER   | Hydrogen Evolution Reaction                 |
| LSV   | Linear Sweep Voltammetry                    |
| MALDI | Matrix-assisted laser desorption/ionization |
| MeOH  | Methanol                                    |
| MPcs  | Metallophthalocyanines                      |
| NMR   | Nuclear magnetic resonance                  |
| n-Oct | n-Octyl                                     |
| PAs   | Particulate aggregates                      |
| SEM   | Scanning Electron Microscopy                |
| TEM   | Transmission Electron Microscopy            |
| TGA   | Thermal gravimetric analysis                |
| XPS   | X-ray photoelectron spectroscopy            |

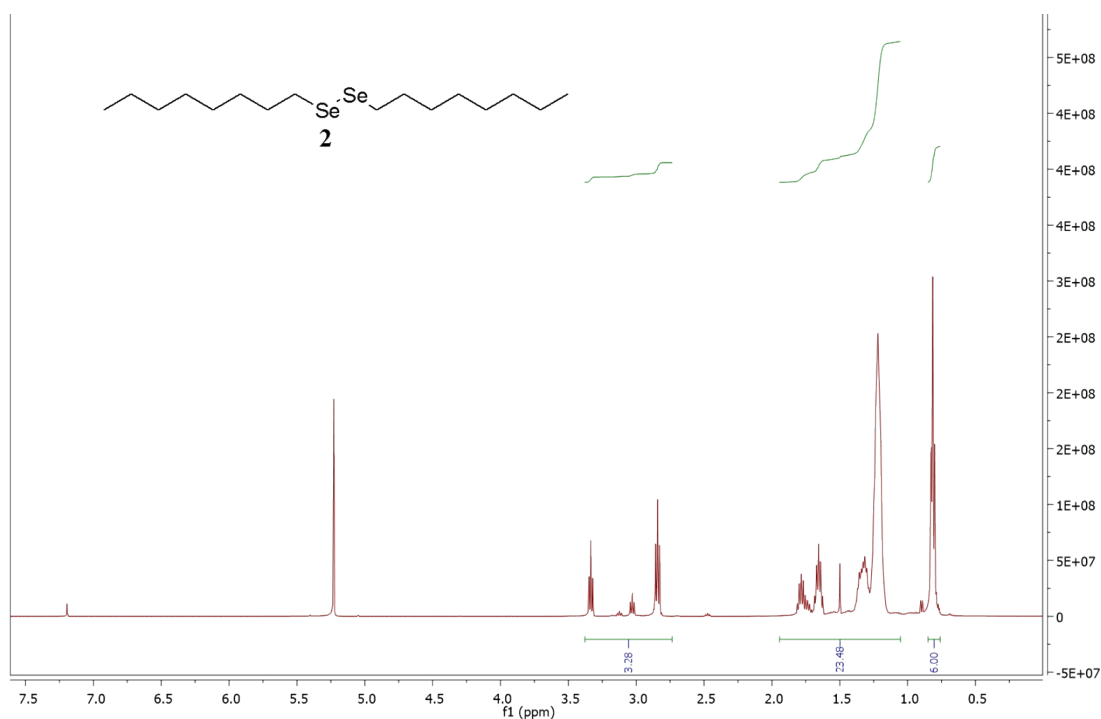

## Spectrum

**Fig S1.**  $^1\text{H}$  NMR spectra of 1,2-dioctylselenane.

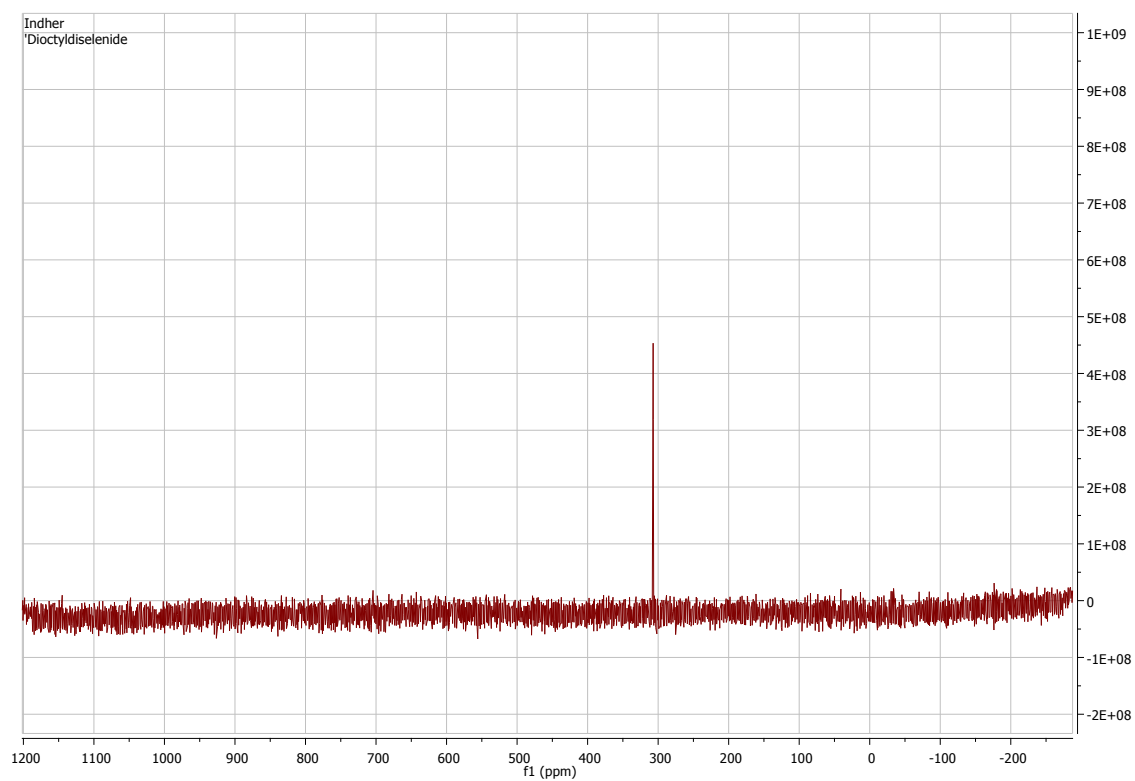

**Fig S2.**  $^{77}\text{Se}$  NMR spectra of 1,2-dioctylselenane.

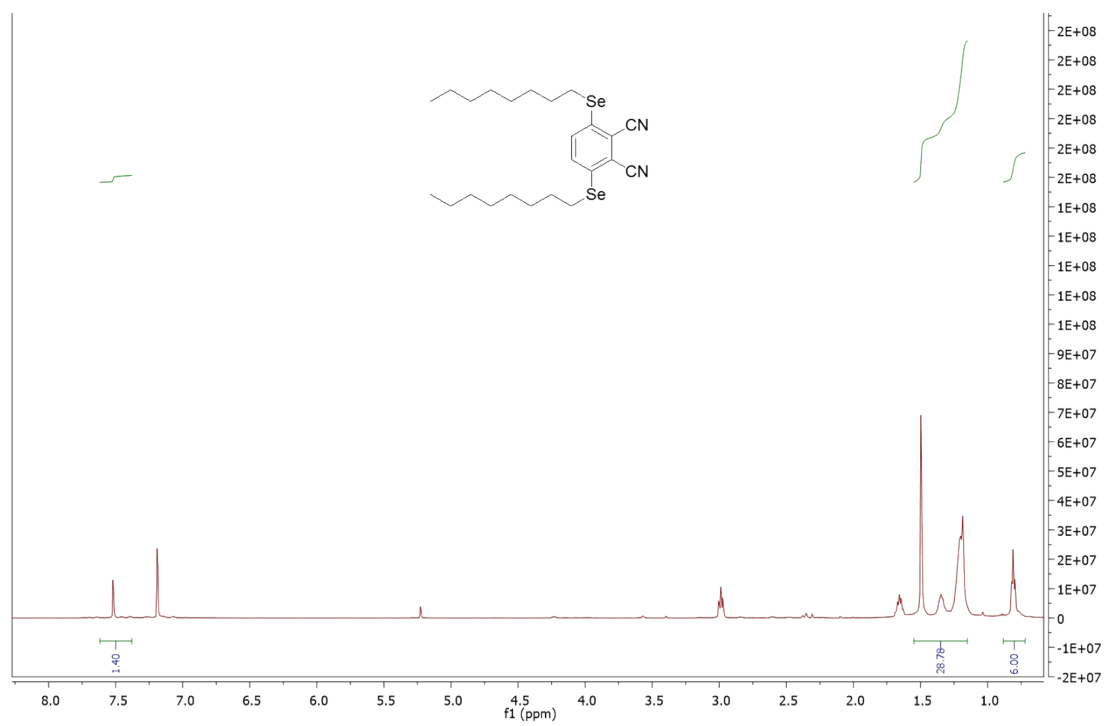

**Fig S3.**  $^1\text{H}$  NMR spectra of 3,6-Bis (n-octylseleno)phthalodinitrile.

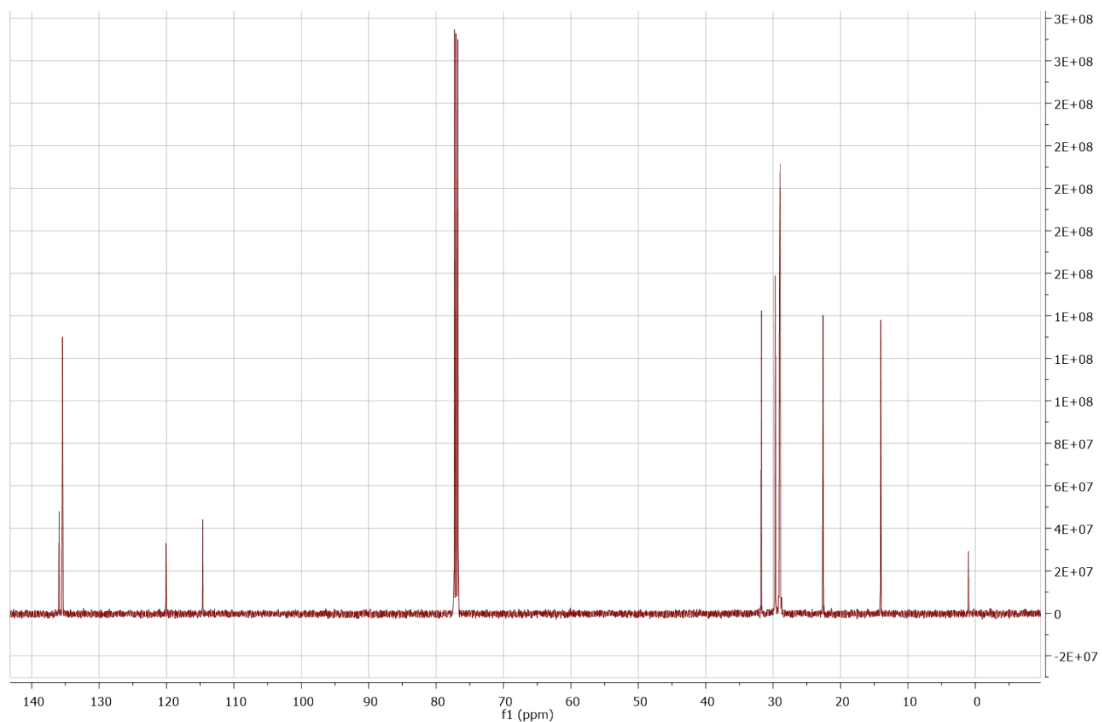

**Fig S4.**  $^{13}\text{C}$  NMR spectra of 3,6-Bis (n-octylseleno)phthalodinitrile

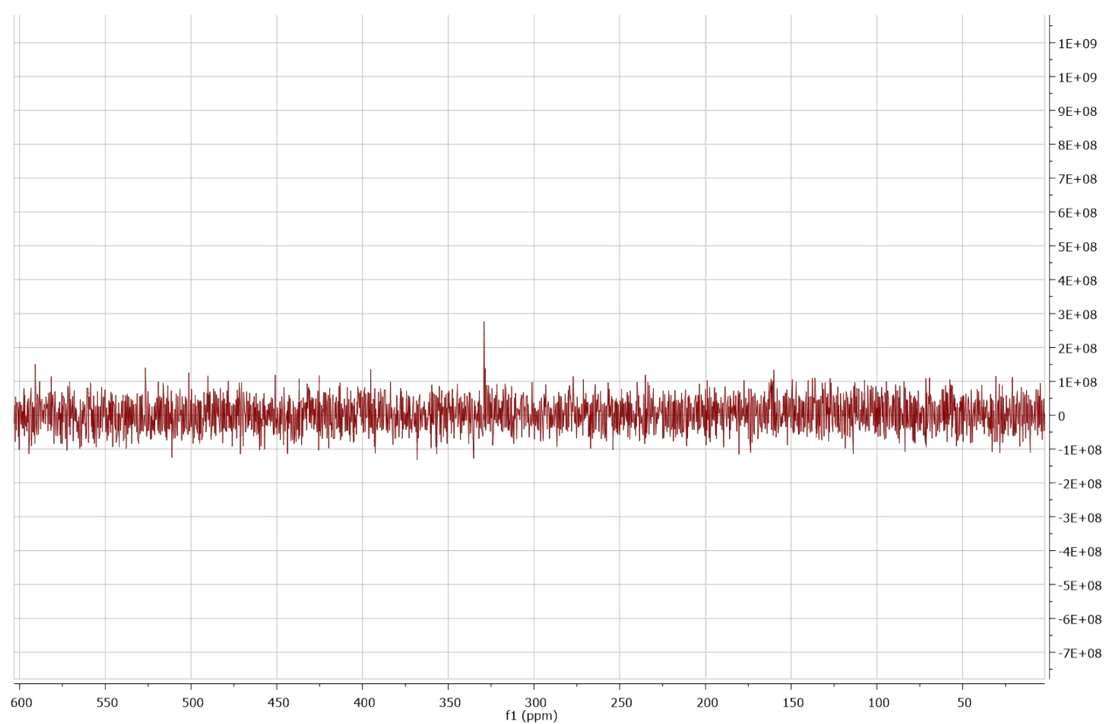

**Fig S5.**  $^{77}\text{Se}$  NMR spectra of 3,6-Bis (n-octylseleno)phthalodinitrile.

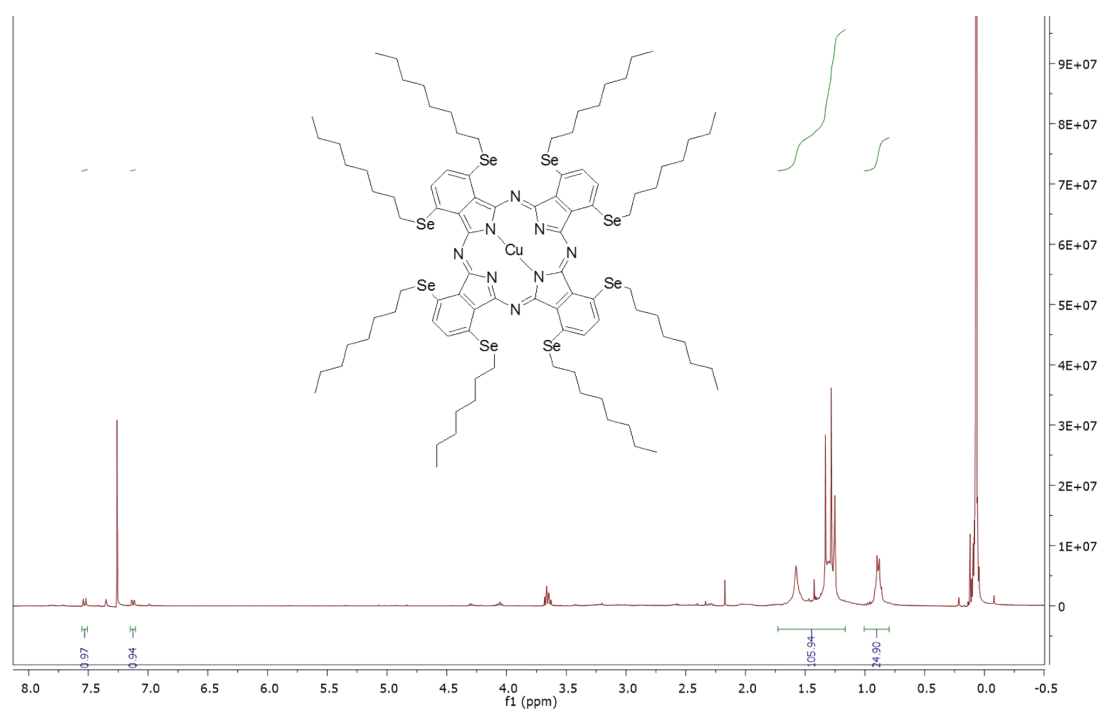

**Fig S6.**  $^1\text{H}$  NMR spectra of  $(n\text{-OctSe})_8\text{CuPc}$

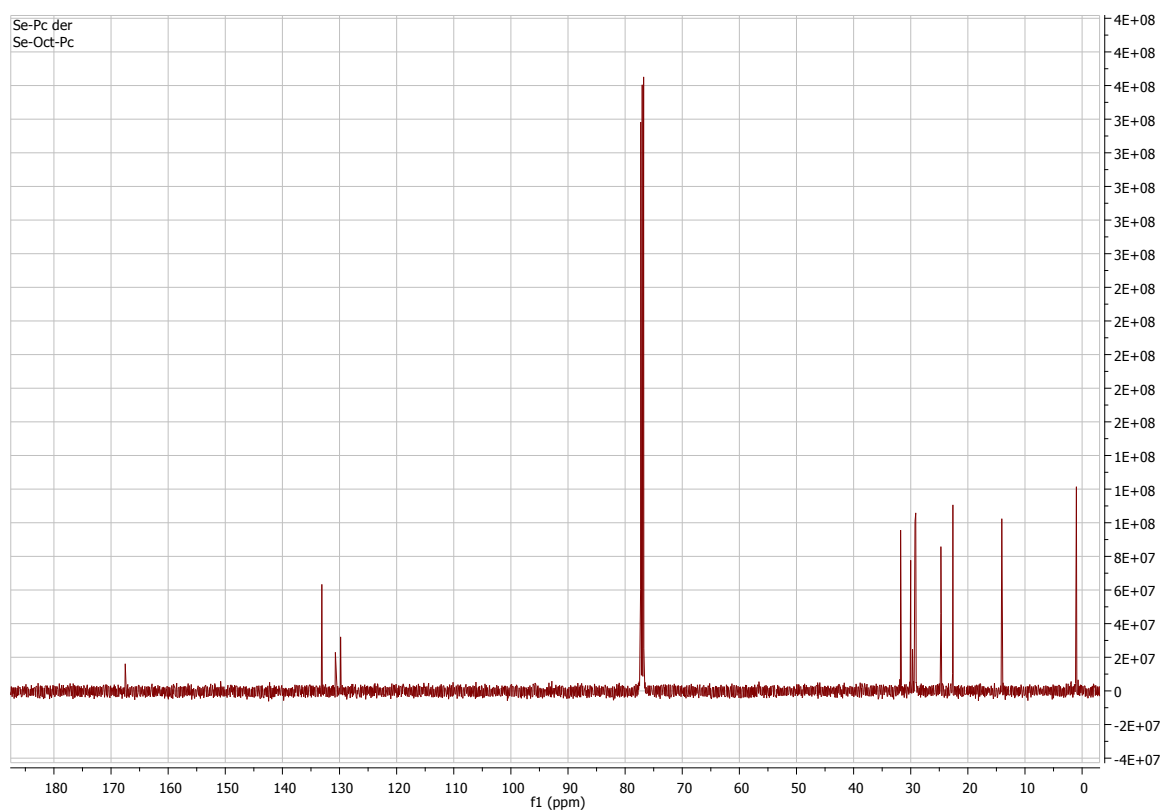

**Fig S7.**  $^{13}\text{C}$  NMR spectra of  $(n\text{-OctSe})_8\text{CuPc}$

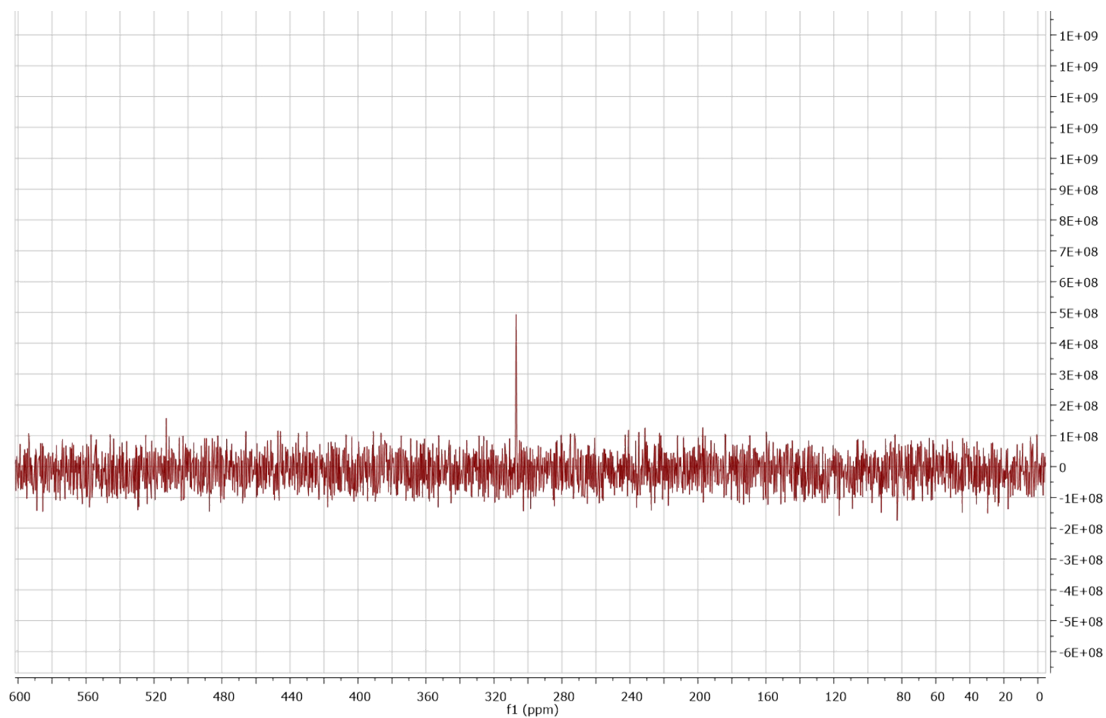

**Fig S8.**  $^{77}\text{Se}$  NMR spectra of  $(n\text{-OctSe})_8\text{CuPc}$

### 3. UV-Visible spectrum of $(n\text{-OctSe})_8\text{CuPc}$

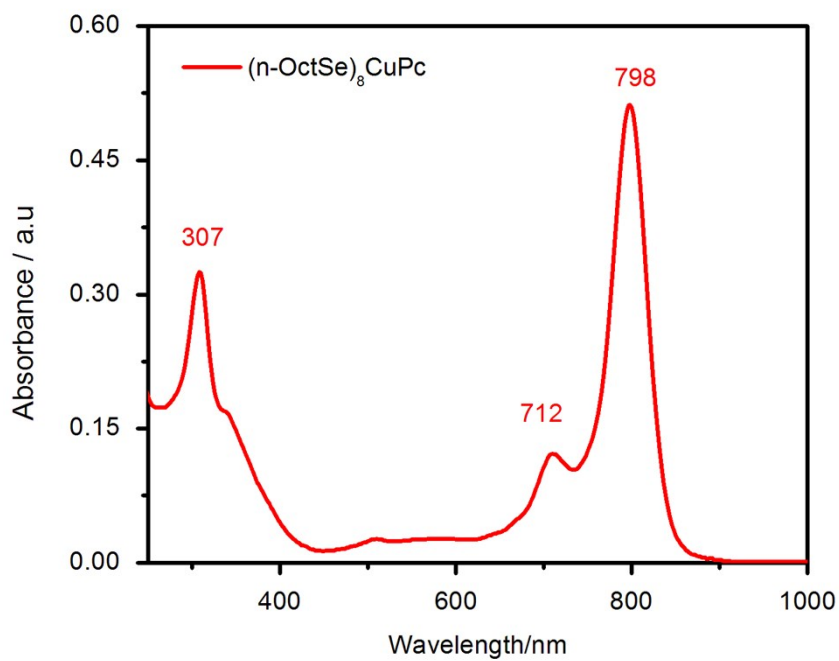

**Fig S9.** UV-Visible spectrum of  $(n\text{-OctSe})_8\text{CuPc}$ , recorded in dichloromethane.

#### 4. EPR spectrum of (n-OctSe)<sub>8</sub>CuPc

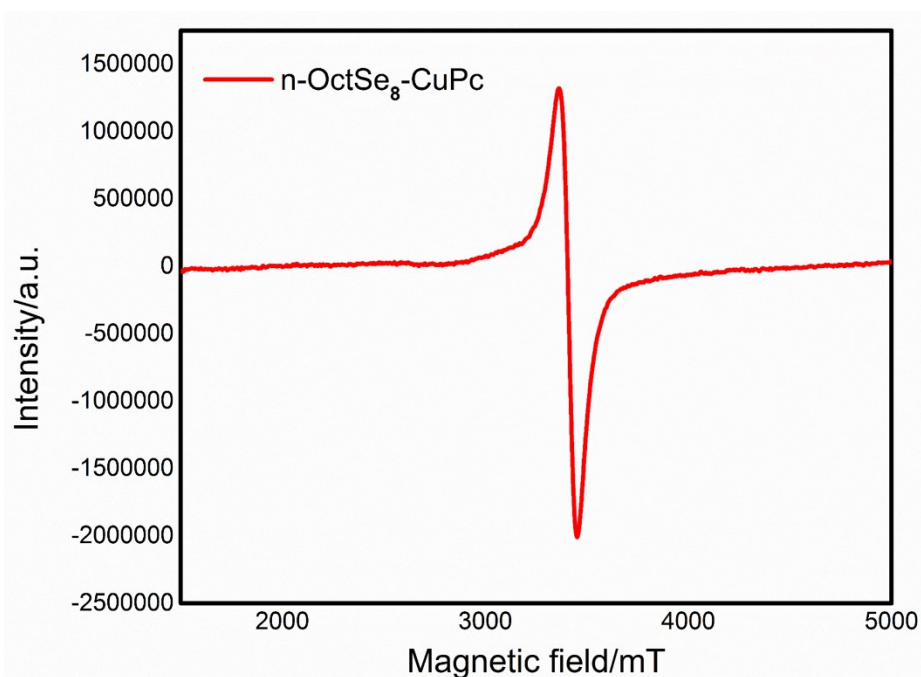

Fig S10. EPR spectrum of (n-OctSe)<sub>8</sub>-CuPc.

#### 5. Cyclic voltammogram of (n-OctSe)<sub>8</sub>-CuPc

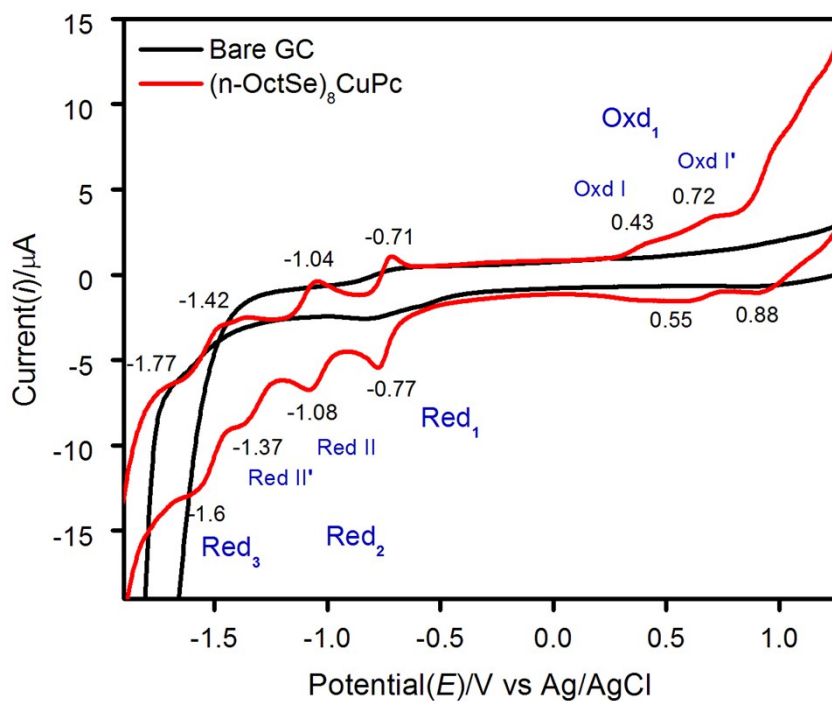

Fig S11. Shows the cyclic voltammograms of (n-OctSe)<sub>8</sub>-CuPc (1 mM) in CH<sub>2</sub>Cl<sub>2</sub> containing 0.1 M of tetrabutylammonium hexafluorophosphate as supporting electrolyte.



## 6. A general scheme for selenoxide elimination reaction

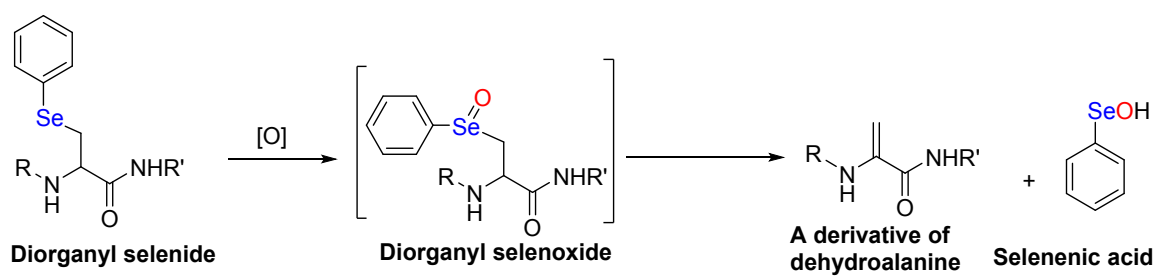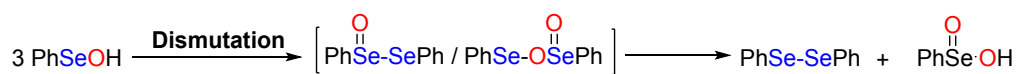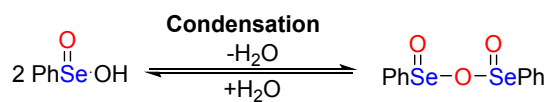

**Fig S12.** Reaction pathways for selenoxide elimination reaction, and subsequent dismutation-condensation reaction for a general case

## 7. MALDI Characterization

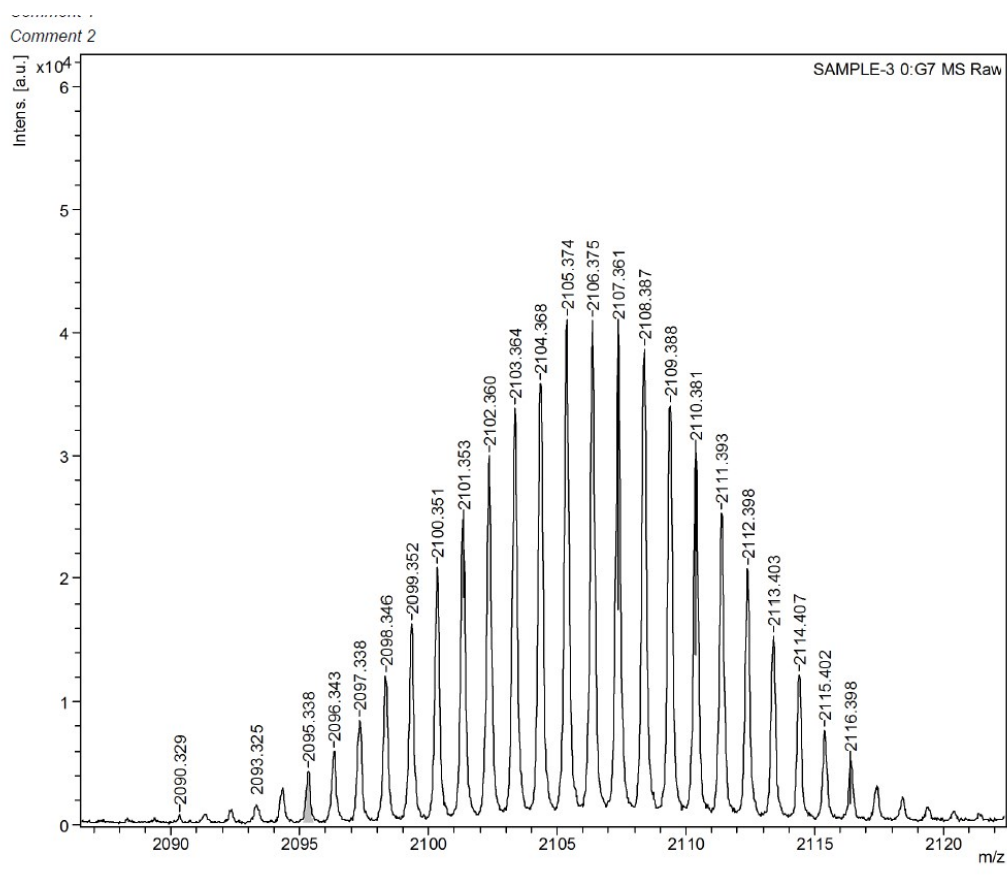

**Fig S13.** Shows the MALDI mass spectrometry peaks of compound **4**

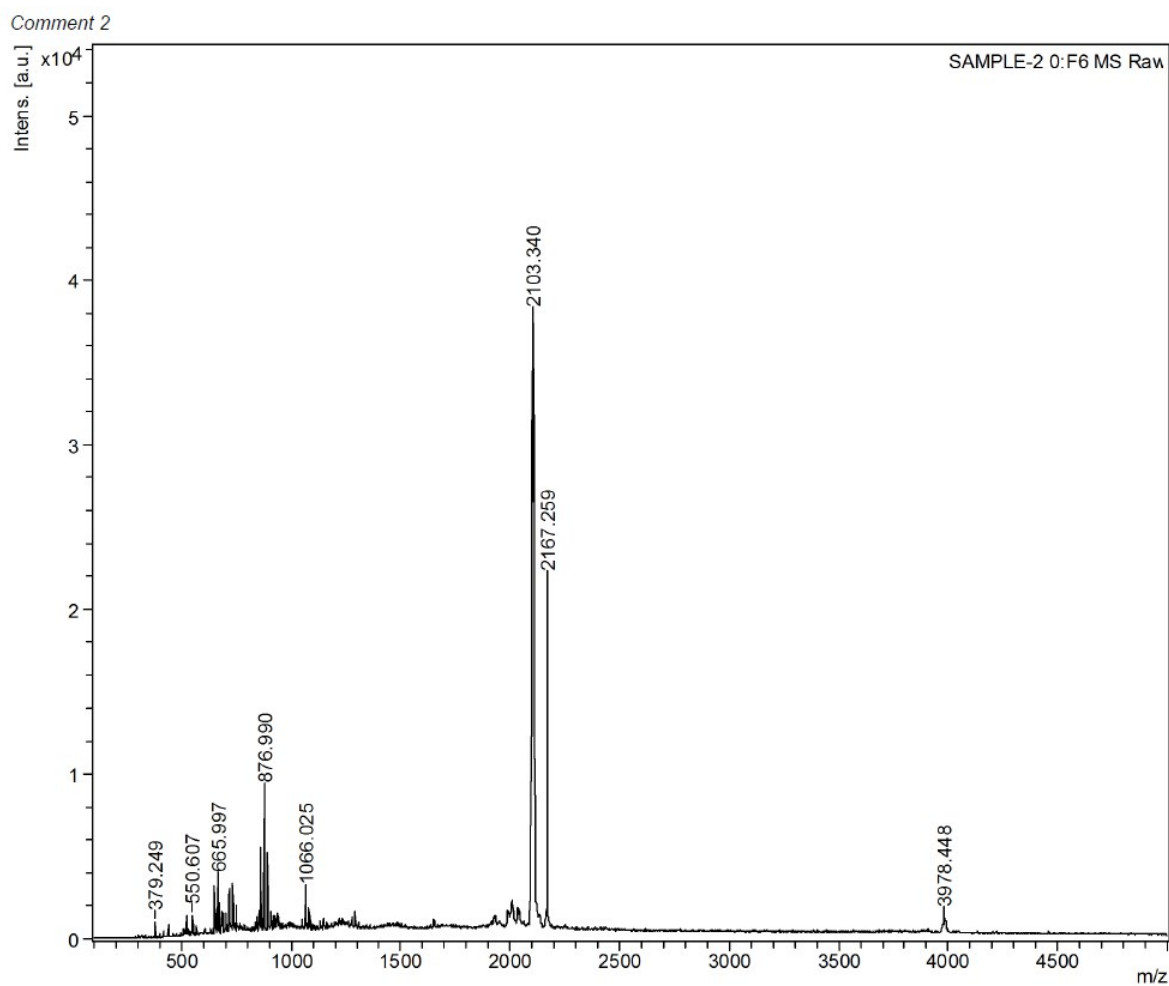

**Fig S14.** Shows the MALDI mass spectrum of intermediate species observed from the extract of FAs. It shows the peak corresponding to compound **4** (@m/z, 2103.340), **7** (@m/z, 2167.259), and **8** (@m/z, 3978.44). The expansion and the peaks corresponding to species **7** and **8** are provided below in figure **S15** and **S16** respectively.

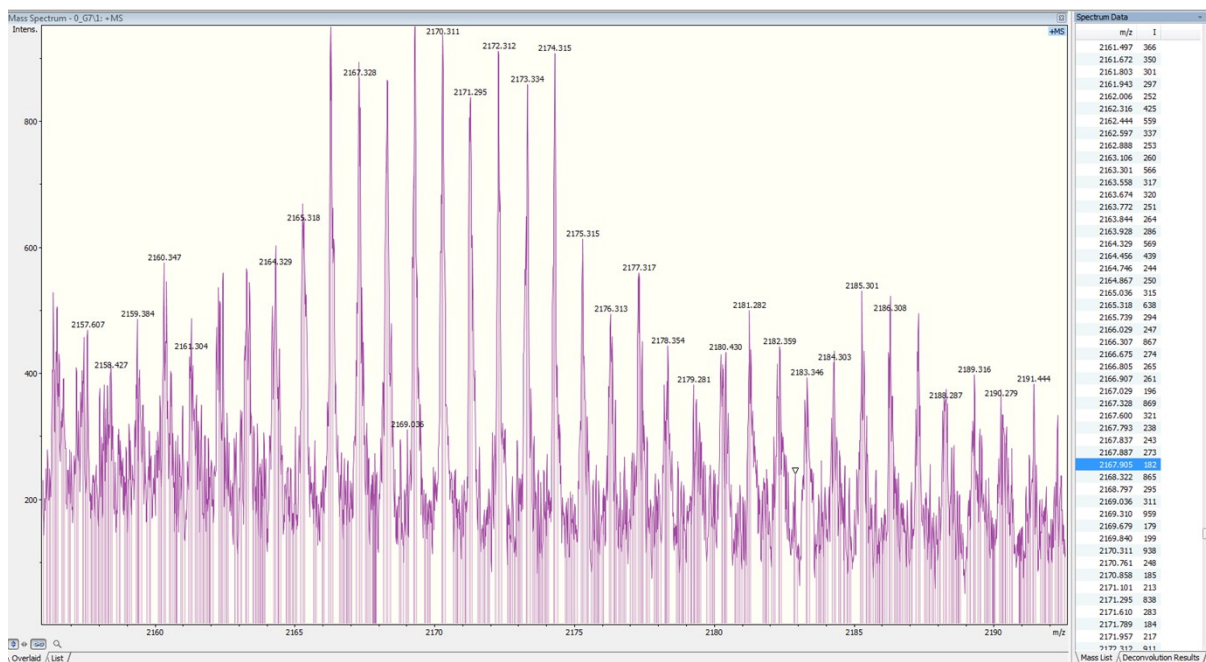

Fig S15. Expansion of peak observed for selenoxide 7

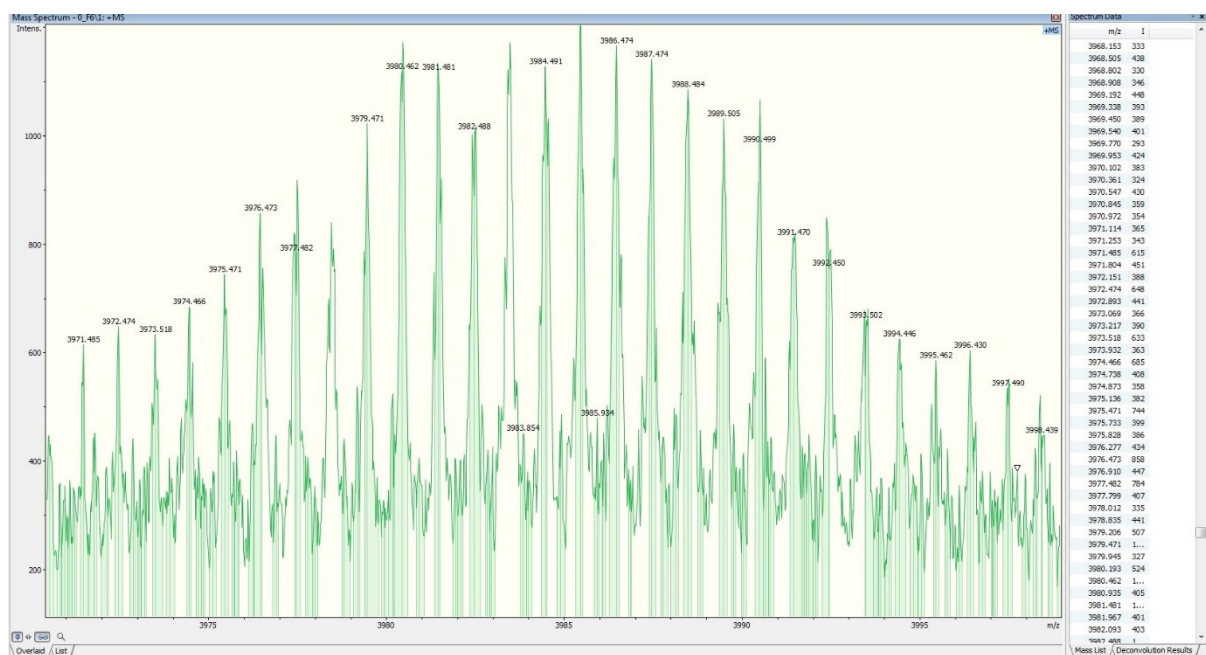

Fig S16. Expansion of peak observed for diselenide 8

## 8. X-Ray Photoelectron Spectroscopic (XPS) data

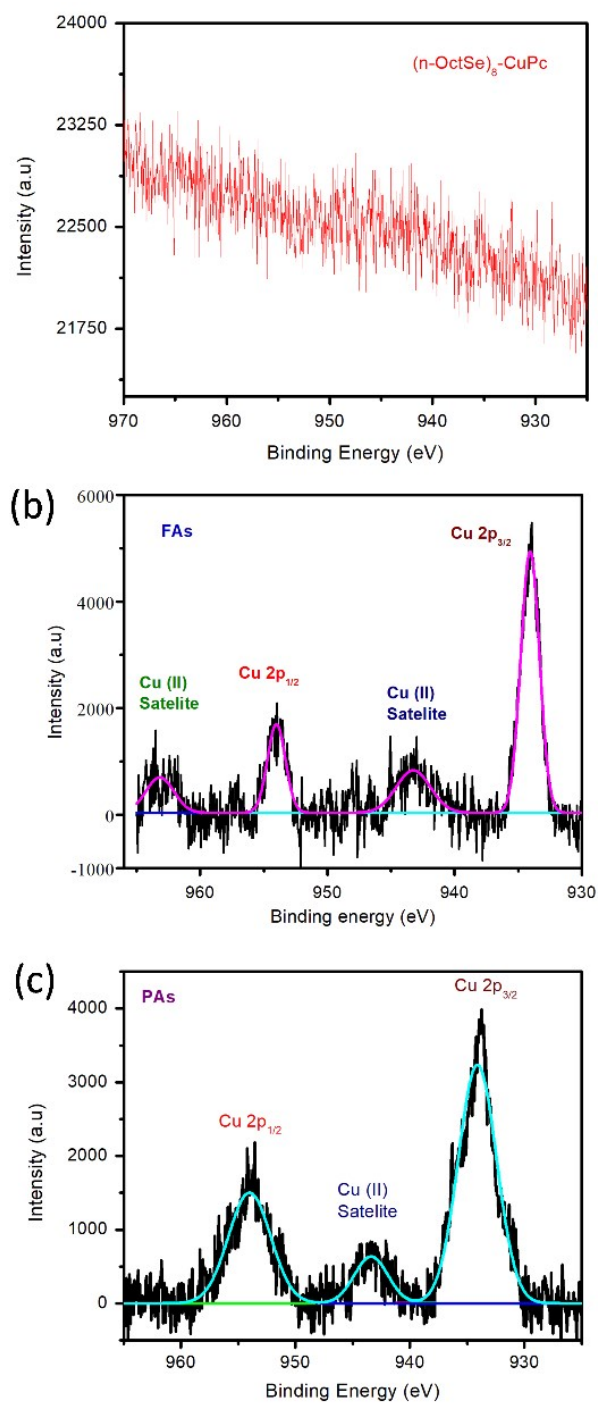

**Fig S17.** Shows the XPS of copper present in the a)  $(n\text{OctSe})_8\text{-CuPc}$ , b) FAs, and c) PAs.

## 9. FTIR spectrum FAs and PAs

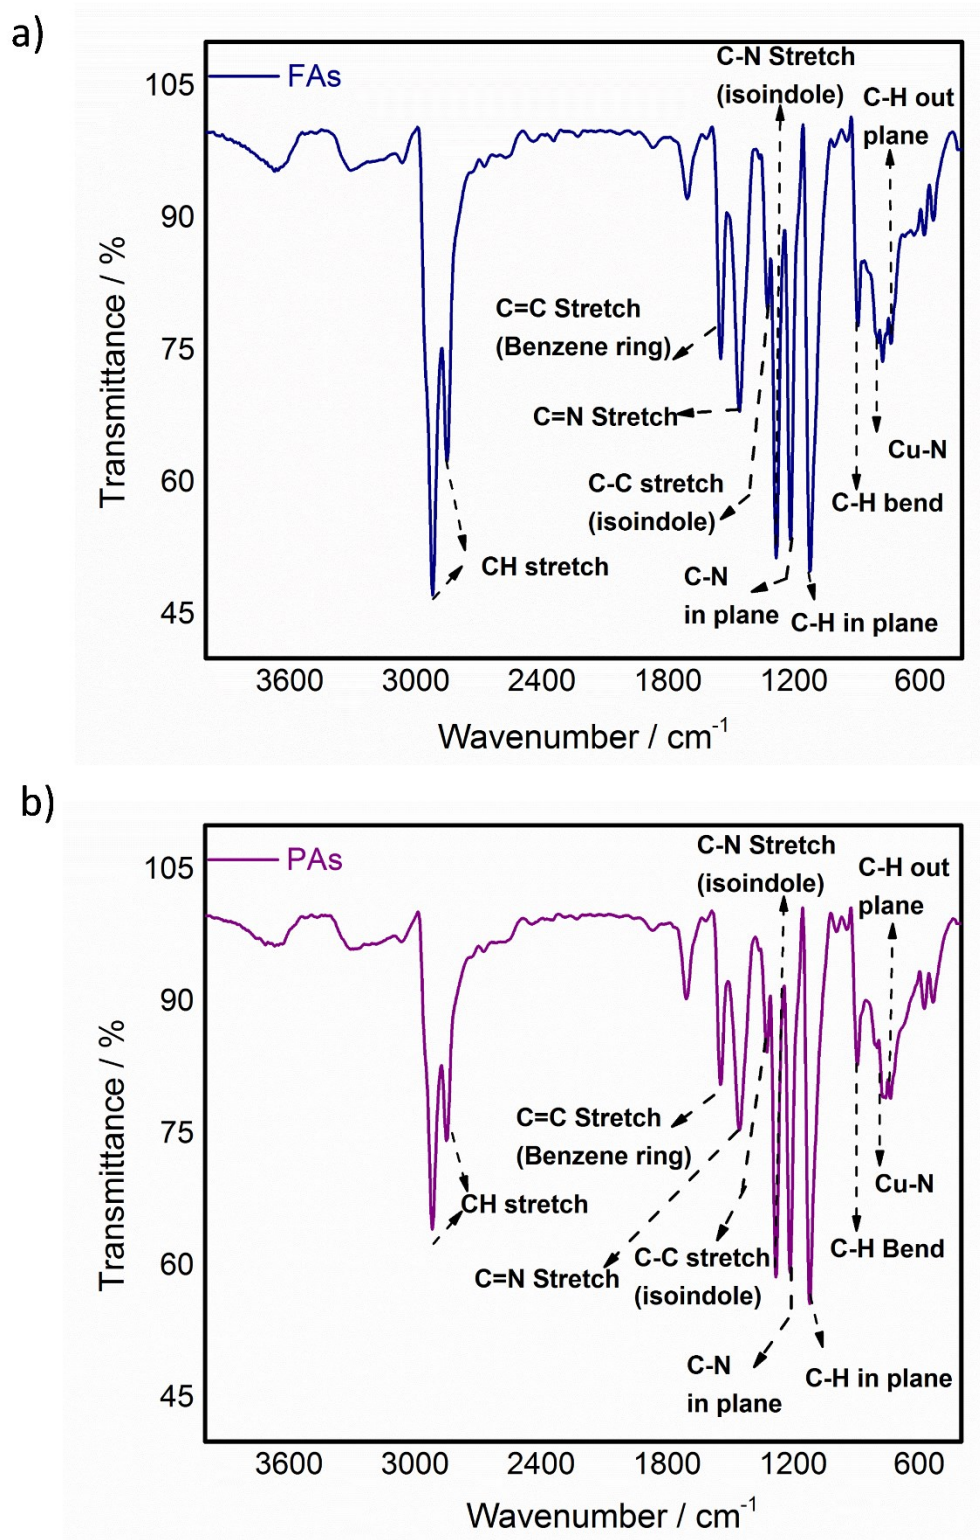

**Fig S18.** Shows the FTIR spectrum of a) FAs, and b) PAs

## 10. Electrochemically active surface area (EASA) measurements

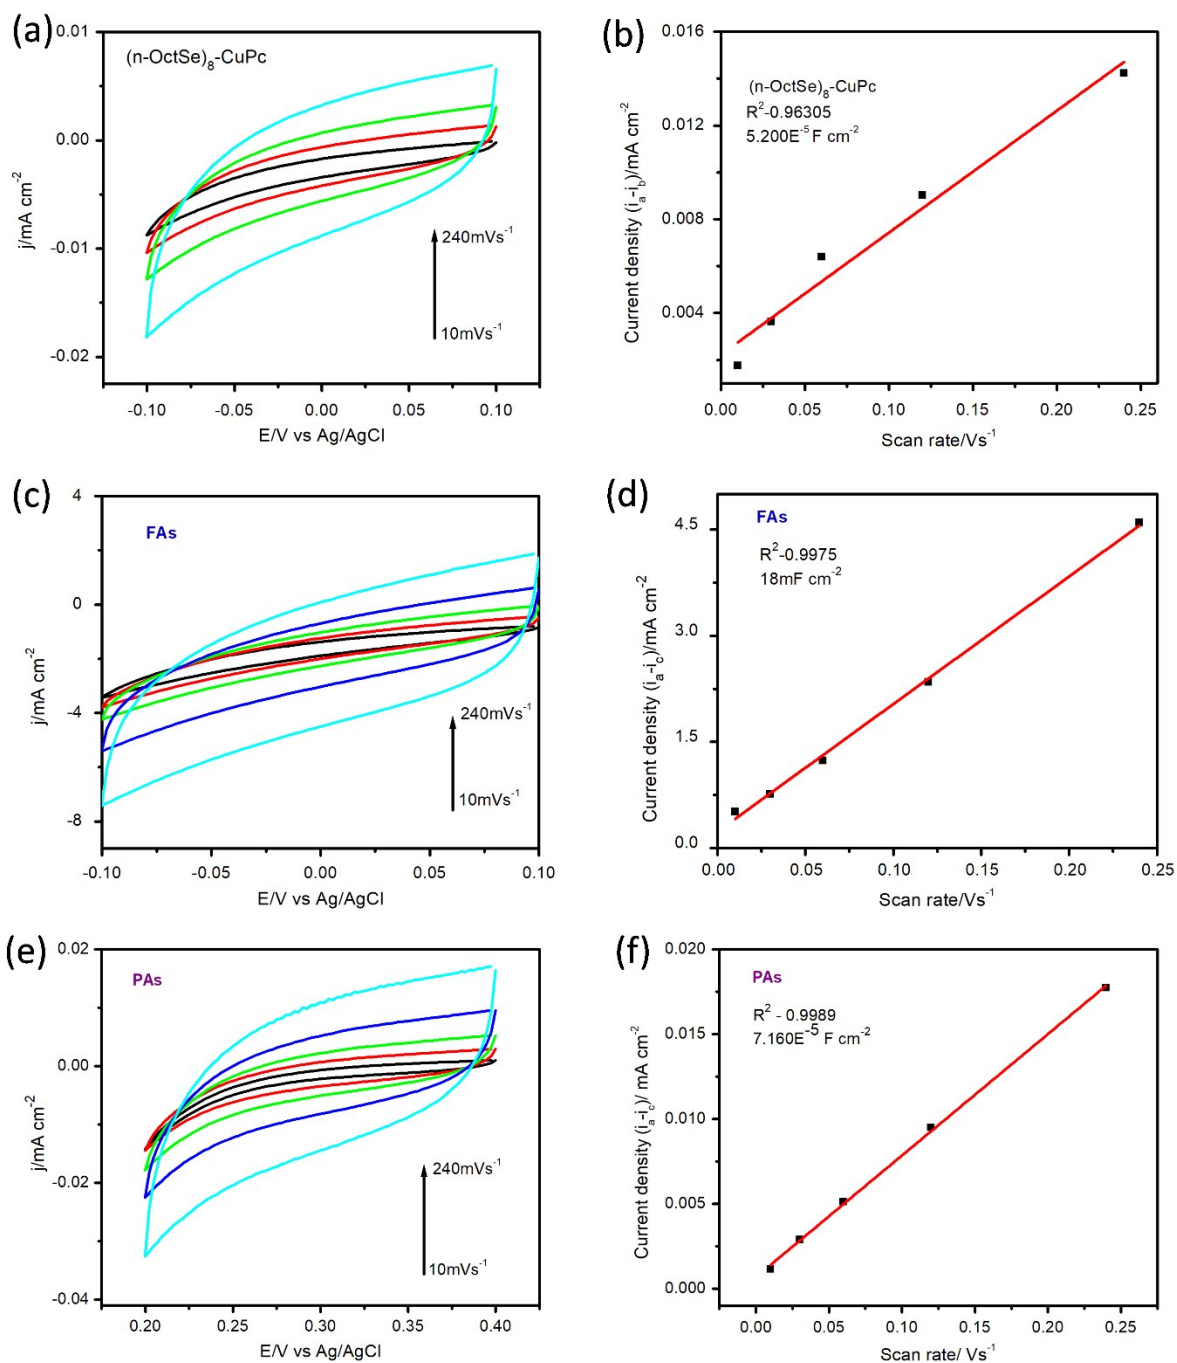

**Fig S19.** CV, current density Vs Potential (E) plots; a, c, e, correspond to (n-OctSe)<sub>8</sub>-CuPc, FAs, and PAs respectively. Figure b, d, f are corresponding current density Vs scan rate plot. The CV was recorded in 0.5M H<sub>2</sub>SO<sub>4</sub> solution with Ag/AgCl as reference electrode.

## 11. Cycling stability of FAs and PAs

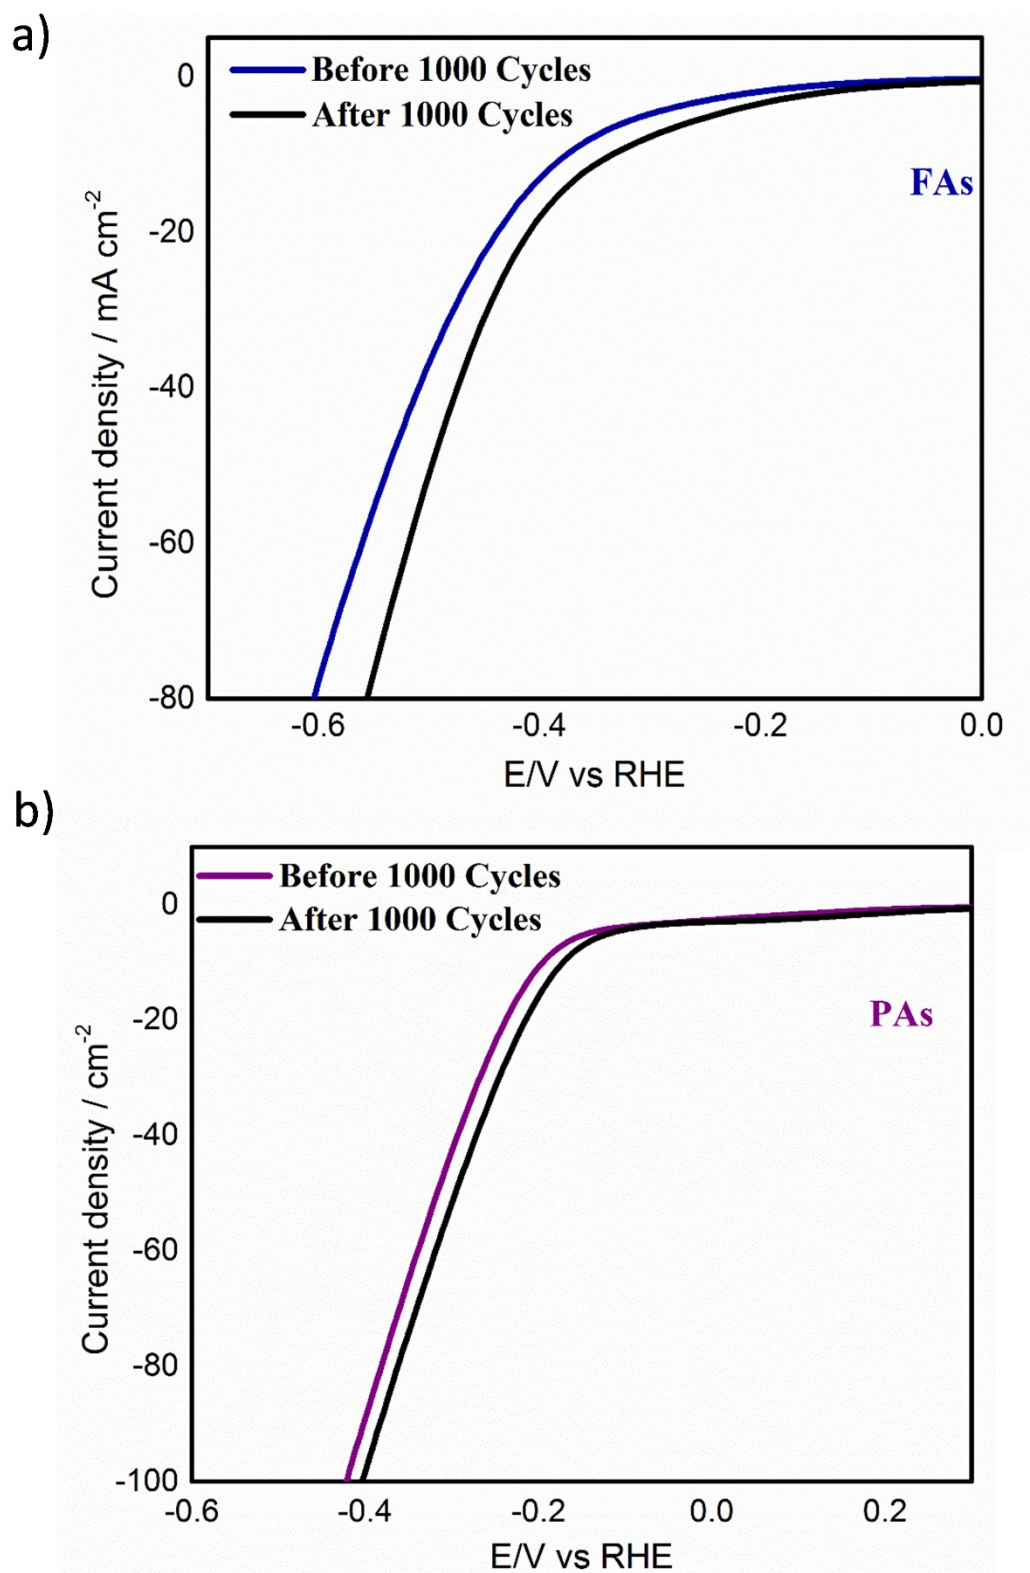

**Fig S20.** Shows polarization graph of cycle 1 and cycle 1000 for a) FAs and b) PAs



## 12. Post-HER TEM imaging

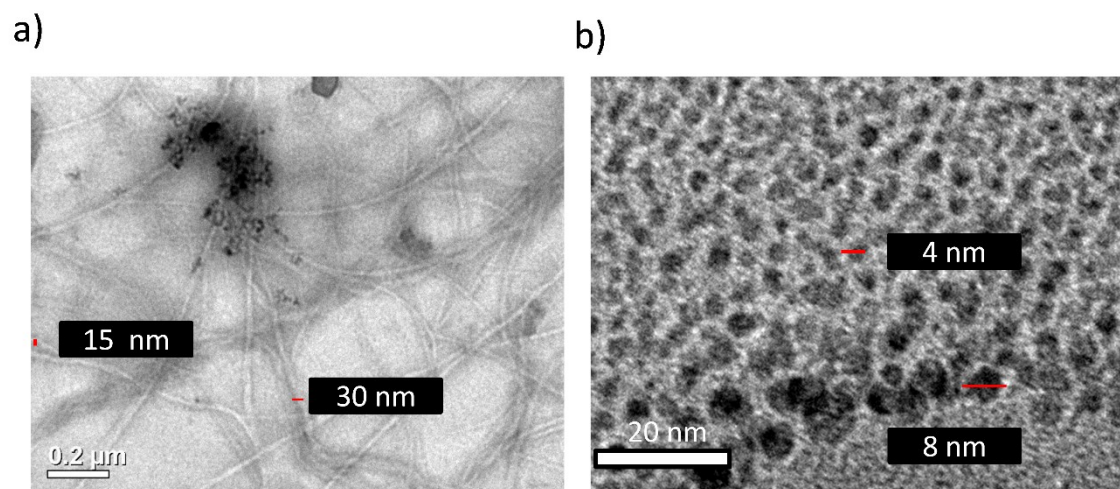

**Fig. S21.** Shows the TEM images taken after chronoamperometric HER; a) FAs, b) PAs

### 13. FTIR Spectrum of PAs before and after catalysis

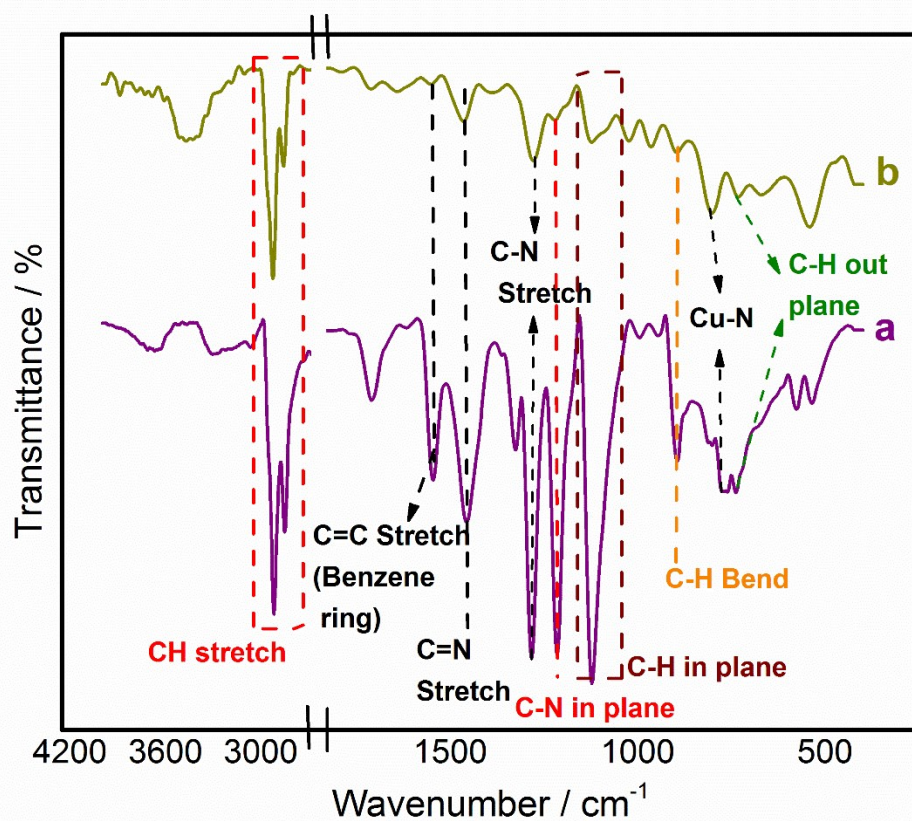

**Fig. S22.** Shows the FTIR spectrum of PAs a) before catalysis b) after catalysis

## 14. HER overpotential comparison

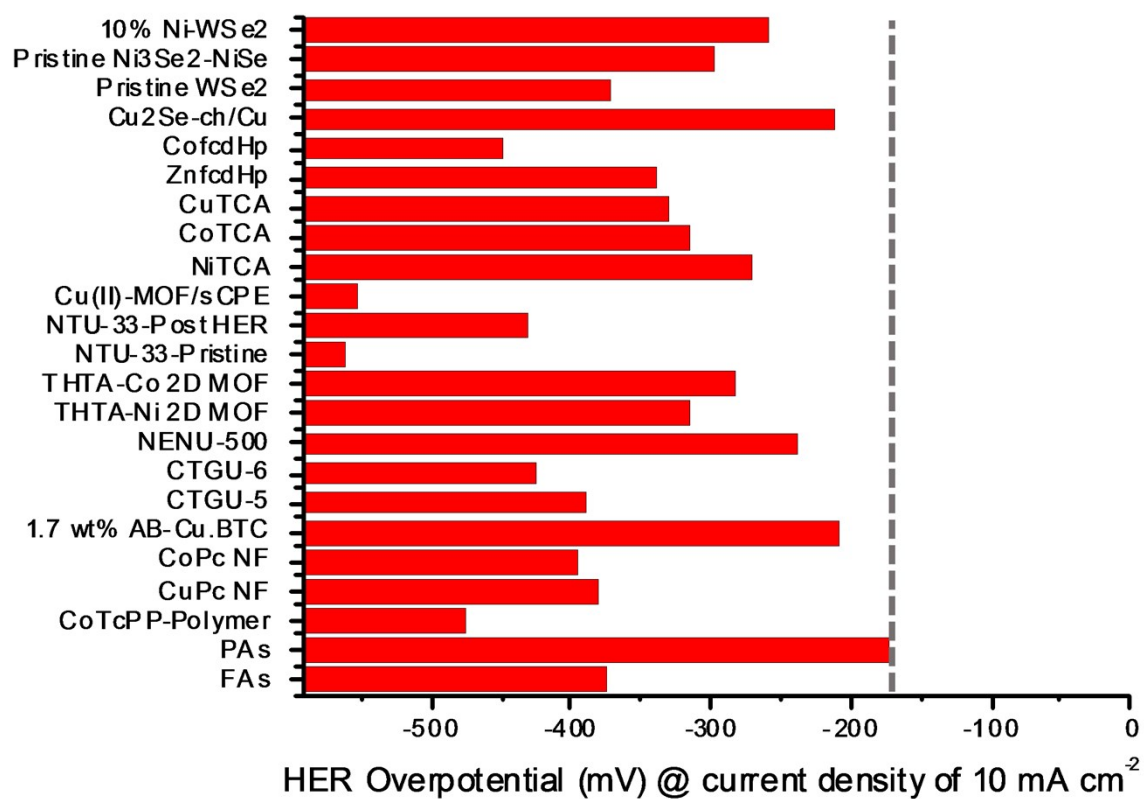

**Fig S23.** Histogram plot comparing HER overpotential (mV (x-axis)) of PAAs with other coordination polymers and MOFs reported in the literature (Table S2).

## 15. Table S1 and Table S2

**Table S1.** Cyclic voltammetric data for compound 4

| Compound                     | Redox Waves                         | $E_{1/2}$ (V) | $E_p$ (mV) | $I_{p,a}/I_{p,c}$ |
|------------------------------|-------------------------------------|---------------|------------|-------------------|
| (n-OctSe) <sub>8</sub> -CuPc | Red <sub>1</sub>                    | -0.74         | 60         | 0.23              |
|                              | Red <sub>2</sub> (Red II (Red II')) | -1.06 (-1.40) | 40 (50)    | 0.57 (0.32)       |
|                              | Red <sub>3</sub>                    | -1.69         | 170        | 0.52              |
|                              | Oxd <sub>1</sub> (Oxd I (Oxd I'))   | 0.49 (0.80)   | 120 (160)  | 1.21 (2.6)        |

<sup>a</sup>  $E_{1/2} = (E_{pa} + E_{pc})/2$  were recorded at 100 mV/s scan rate

<sup>b</sup>  $\Delta E_p = E_{pa} - E_{pc}$

<sup>c</sup>  $I_{p,a}/I_{p,c}$  for reduction,  $I_{p,c}/I_{p,a}$  for oxidation processes.

**Table S2;** Comparison of HER activity parameters with literature data

| Catalyst          | $\eta$ (mV) @<br>10mAcm <sup>-2</sup> | Tafel slope<br>[mV/dec] | Electrolytes                         | Ref       |
|-------------------|---------------------------------------|-------------------------|--------------------------------------|-----------|
| FAs               | -375                                  | 252                     | 0.5 M H <sub>2</sub> SO <sub>4</sub> | This work |
| PAs               | -172                                  | 180                     | 0.5 M H <sub>2</sub> SO <sub>4</sub> | This work |
| CoTcPP-Polymer    | -475                                  | 197                     | 0.5 M H <sub>2</sub> SO <sub>4</sub> | 1         |
| FCoP@CNT          | -576 <sup>a</sup>                     | 126                     | 0.5M H <sub>2</sub> SO <sub>4</sub>  | 2         |
| CuPc NF           | -380                                  | 121                     | 0.5M H <sub>2</sub> SO <sub>4</sub>  | 3         |
| CoPc NF           | -395                                  | 108                     | 0.5M H <sub>2</sub> SO <sub>4</sub>  | 3         |
| Cu-BTC MOF        | -369 <sup>b</sup>                     | 135                     | 0.5M H <sub>2</sub> SO <sub>4</sub>  | 4         |
| 1.7 wt% AB-Cu.BTC | -208                                  | 80                      | 0.5M H <sub>2</sub> SO <sub>4</sub>  | 5         |
| CTGU-5            | -388                                  | 125                     | 0.5M H <sub>2</sub> SO <sub>4</sub>  | 6         |
| CTGU-6            | -425                                  | 176                     | 0.5M. H <sub>2</sub> SO <sub>4</sub> | 6         |
| NENU-500          | -237                                  | 96                      | 0.5M H <sub>2</sub> SO <sub>4</sub>  | 7         |
| THTA-Ni 2D MOF    | -315                                  | 76                      | 0.5M H <sub>2</sub> SO <sub>4</sub>  | 8         |
| THTA-Co 2D MOF    | -283                                  | 71                      | 0.5M H <sub>2</sub> SO <sub>4</sub>  | 8         |
| NTU-33-Pristine   | -560                                  | 158                     | 0.5M H <sub>2</sub> SO <sub>4</sub>  | 9         |
| NTU-33-Post HER   | -430                                  | 129                     | 0.5 M H <sub>2</sub> SO <sub>4</sub> | 9         |

|                                                |      |     |                                      |    |
|------------------------------------------------|------|-----|--------------------------------------|----|
| Cu(II)-MOF/sCPE                                | -552 | 62  | 1.0 M H <sub>2</sub> SO <sub>4</sub> | 10 |
| NiTCA                                          | -270 | 89  | 0.5M H <sub>2</sub> SO <sub>4</sub>  | 11 |
| CoTCA                                          | -315 | 96  | 0.5M H <sub>2</sub> SO <sub>4</sub>  | 11 |
| CuTCA                                          | -330 | 100 | 0.5M H <sub>2</sub> SO <sub>4</sub>  | 11 |
| ZnfcH <sub>p</sub>                             | -340 | 110 | 0.5 M H <sub>2</sub> SO <sub>4</sub> | 12 |
| CofcH <sub>p</sub>                             | -450 | 120 | 0.5 M H <sub>2</sub> SO <sub>4</sub> | 12 |
| Cu <sub>2</sub> Se-ch/Cu                       | -212 | 32  | 0.5 M H <sub>2</sub> SO <sub>4</sub> | 13 |
| Pristine WSe <sub>2</sub>                      | -372 | 105 | 0.5 M H <sub>2</sub> SO <sub>4</sub> | 14 |
| Pristine Ni <sub>3</sub> Se <sub>2</sub> -NiSe | -298 | 71  | 0.5 M H <sub>2</sub> SO <sub>4</sub> | 14 |
| 10% Ni-WSe <sub>2</sub>                        | -259 | 86  | 0.5 M H <sub>2</sub> SO <sub>4</sub> | 14 |

<sup>a</sup>to reach 1mAcm<sup>-2</sup>, <sup>b</sup>to reach 30mAcm<sup>-2</sup>

## 16. References

- 1 Y. Wu, J. M. Veleta, D. Tang, A. D. Price, C. E. Botez and D. Villagrán, *Dalt. Trans.*, 2018, **47**, 8801–8806.
- 2 G. Xu, H. Lei, G. Zhou, C. Zhang, L. Xie, W. Zhang and R. Cao, *Chem. Commun*, 2019, **55**, 12647–12650.
- 3 K. P. Madhuri and N. S. John, *ChemistrySelect*, 2019, **4**, 7292–7299.
- 4 M. Jahan, Z. Liu and K. P. Loh, *Adv. Funct. Mater.*, 2013, **23**, 5363–5372.
- 5 X. Wang, W. Zhou, Y. Wu, J. Tian, X. Wang, D. Huang, J. Zhao and D. Li, *J. Alloys Compd.*, 2018, **753**, 228–233.
- 6 Y. Wu, W. Zhou, J. Zhao, W. Dong, Y. Lan, D. Li, C. Sun and X. Bu, *Angew. Chemie - Int. Ed.*, 2017, **56**, 13001–13005.
- 7 J. Qin, D. Du, W. Guan, X. Bo, Y. Li, L. Guo, Z. Su, Y. Wang, Y. Lan and H. Zhou, *J. Am. Chem. Soc.*, 2015, **137**, 7169–7177.
- 8 R. Dong, Z. Zheng, D. C. Tranca, J. Zhang, N. Chandrasekhar, S. Liu, X. Zhuang, G. Seifert and X. Feng, *Chem. - A Eur. J.*, 2017, **23**, 2255–2260.

- 9 B. Zhou, J. Zheng, J. Duan, C. Hou, Y. Wang, W. Jin and Q. Xu, *ACS Appl. Mater. Interfaces*, 2019, **11**, 21086–21093.
- 10 D. He, J. Liu, Y. Wang, F. Li, B. Li and J. He, *Electrochim. Acta*, 2019, **308**, 285–294.
- 11 S. R. Vishwanath and S. Kandaiah, *J. Mater. Chem. A*, 2017, **5**, 2052–2065.
- 12 R. Shekurov, V. V.Khrizanforova, L. Gilmanova, M. N. Khrizanforov, V. Miluykov, O. Kataeva, Z. Yamaleeva, T. Burganov, T. Gerasimova, A. Khamatgalimov, S. Katsyuba, V. Kovalenko, Y. Krupskaya, V. Kataev, B. Büchner, V. Bon, I. Senkovska, S. Kaskelf, A. Gubaidullina, O. G.Sinyashin and Y. H.Budnikova, *Dalt. Trans.*, 2019, **48**, 3601–3609.
- 13 S. Anantharaj, T. S. Amarnath, E. Subhashini, S. Chatterjee, K. C. Swaathini, K. Karthick and S. Kundu, *ACS Catal.*, 2018, **8**, 5686–5697.
- 14 S. R. Kadam, A. N. Enyashin, L. Houben, R. Bar-Ziv and M. Bar-sadan, *J. Mater. Chem. A*, 2020, **8**, 1403–1416.
